# Supplementary material for: Five new coordination polymers based on a semi-rigid dicarboxylic acid and versatile N-donor ligands: synthesis, characterization and properties
Source: Royal Society of Chemistry journal article supplement (doi:10.1039/c3ce41623b), 2013-01-01
Supplement: c3ce41623b.pdf [file c3ce41623b.pdf]

[Supporting information]

**Five New Coordination Polymers Based on A Semi-rigid  
Dicarboxylic Acid and Versatile N-donor Ligands:  
Synthesis, Characterization and Properties**

**Xianmin Guo<sup>a</sup>, Huadong Guo<sup>\*a</sup>, Hengye Zou<sup>a</sup>, Ruizhan Chen<sup>a</sup> and Yanjuan Qi<sup>\*\*a</sup>**

<sup>a</sup> *Department of Chemistry, Changchun Normal University, Changchun, 130032, P. R. China.*

*Fax: +86-431-86168093; Tel: +86-431-86168093; E-mail: hdxmguo@163.com*

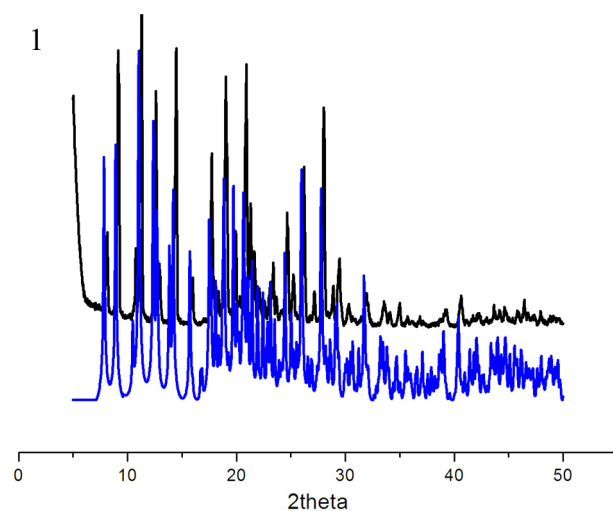

**Figure S1.** The simulated (blue) and experimental (black) XRPD patterns for **1**.

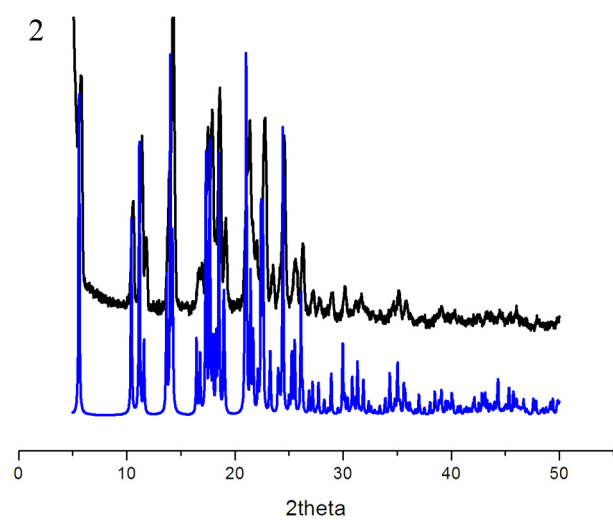

**Figure S2.** The simulated (blue) and experimental (black) XRPD patterns for **2**.

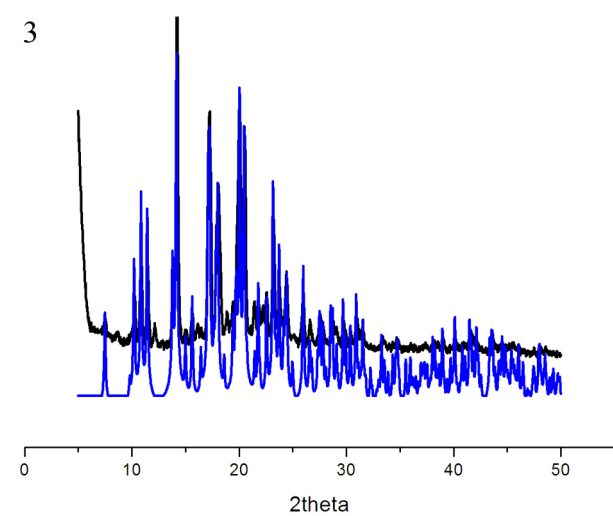

**Figure S3.** The simulated (blue) and experimental (black) XRPD patterns for **3**.

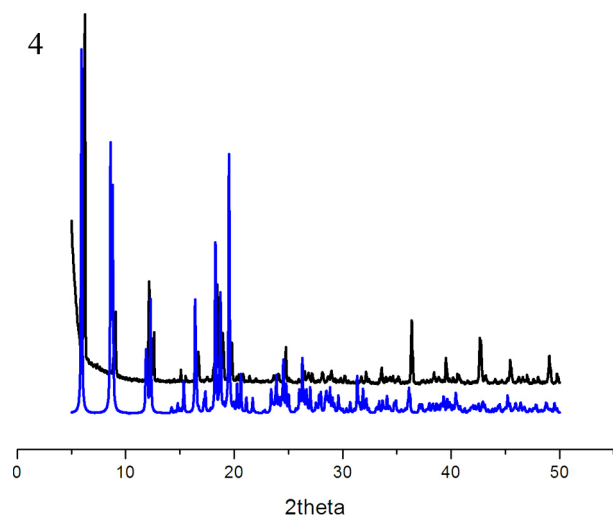

**Figure S4.** The simulated (blue) and experimental (black) XRPD patterns for **4**.

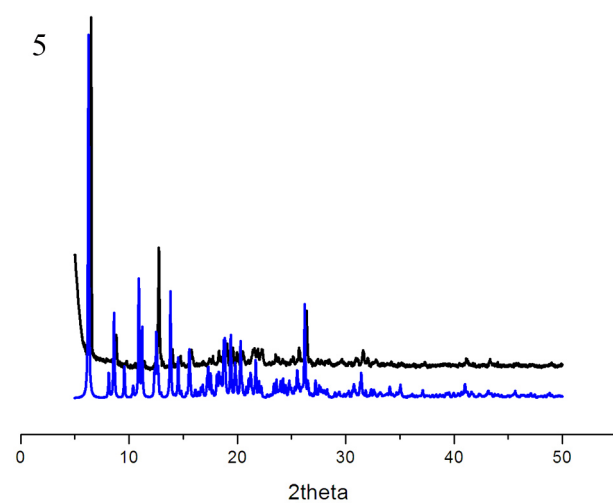

**Figure S5.** The simulated (blue) and experimental (black) XRPD patterns for **5**.

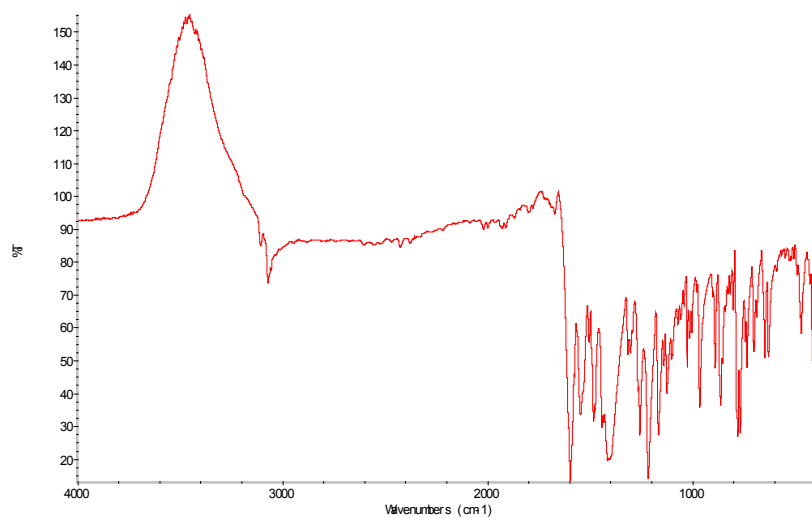

**Figure S6.** IR (4000-400 cm<sup>-1</sup>) spectrum of the compound **1**.

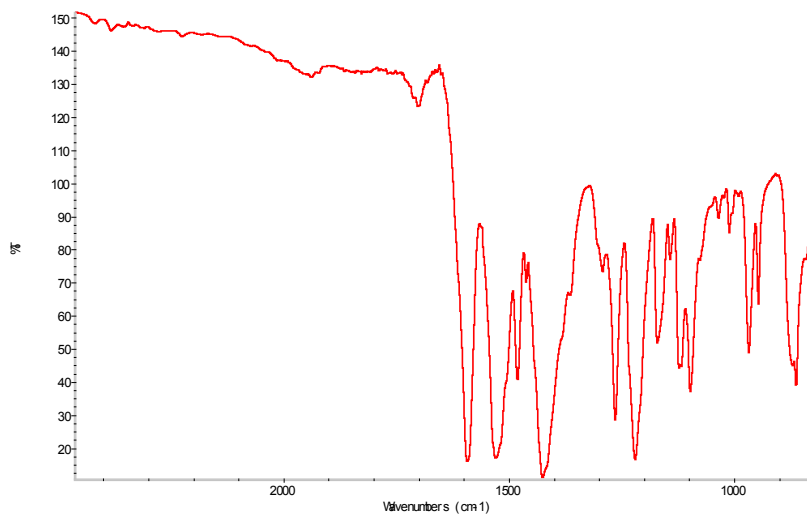

**Figure S7.** IR (4000-400  $\text{cm}^{-1}$ ) spectrum of the compound **2**.

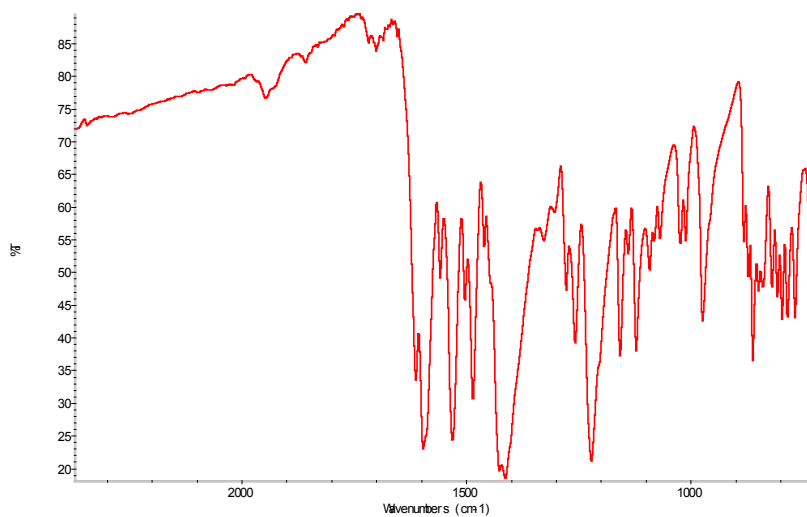

**Figure S8.** IR (4000-400  $\text{cm}^{-1}$ ) spectrum of the compound **3**.

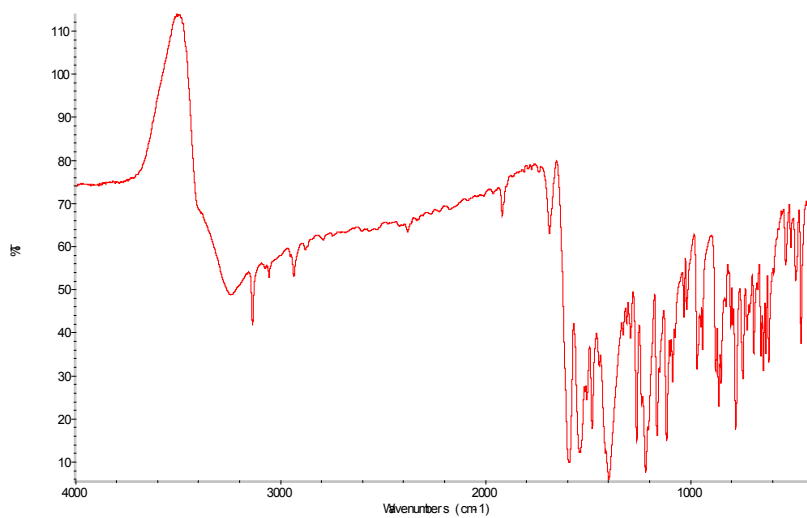

**Figure S9.** IR (4000-400  $\text{cm}^{-1}$ ) spectrum of the compound **4**.

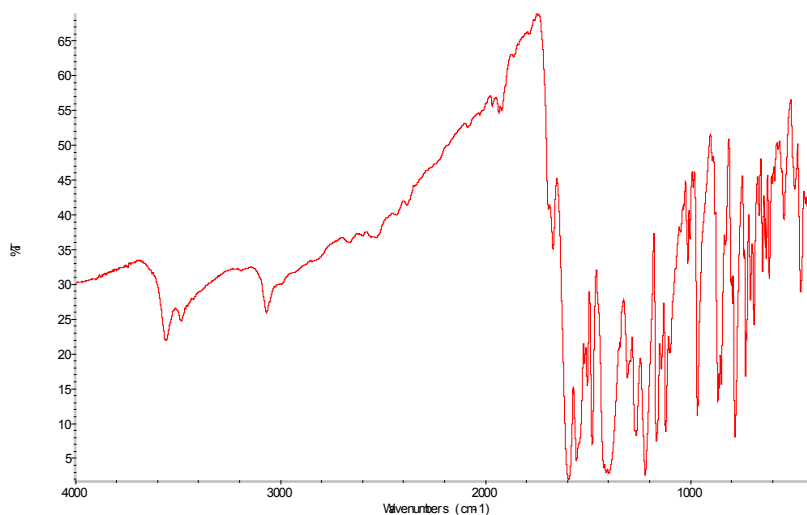

Figure S10. IR (4000-400  $\text{cm}^{-1}$ ) spectrum of the compound 5.

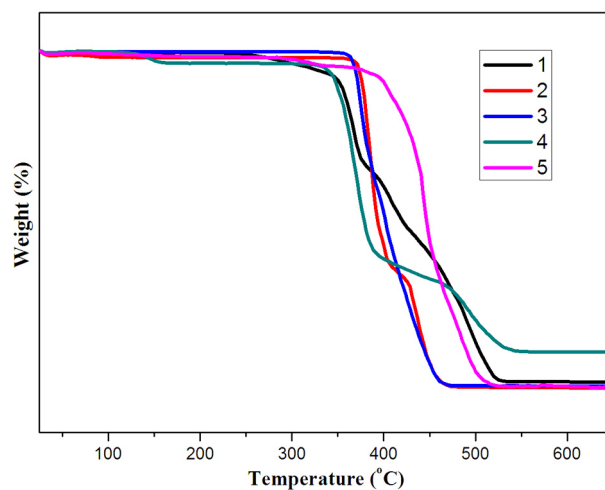

Figure S11. TGA curve of compound 1-5.

Table S1. Selected bond distances ( $\text{\AA}$ ) and angles ( $^\circ$ ) for 1.

---

|                   |            |                   |            |
|-------------------|------------|-------------------|------------|
| Zn(1)-N(1)        | 2.1028(14) | Zn(1)-N(2)        | 2.0999(14) |
| Zn(1)-O(1)#1      | 2.2662(13) | Zn(1)-O(2)#1      | 2.1113(13) |
| Zn(1)-O(5)        | 2.1231(12) | Zn(1)-O(6)        | 2.1621(13) |
| N(2)-Zn(1)-N(1)   | 78.09(6)   | N(2)-Zn(1)-O(2)#1 | 102.15(5)  |
| N(1)-Zn(1)-O(2)#1 | 97.65(5)   | N(2)-Zn(1)-O(5)   | 156.75(5)  |
| N(1)-Zn(1)-O(5)   | 96.86(5)   | O(2)#1-Zn(1)-O(5) | 101.02(5)  |
| N(2)-Zn(1)-O(6)   | 99.35(5)   | N(1)-Zn(1)-O(6)   | 113.17(5)  |
| O(2)#1-Zn(1)-O(6) | 145.41(5)  | O(5)-Zn(1)-O(6)   | 61.42(5)   |

|                     |          |                   |           |
|---------------------|----------|-------------------|-----------|
| N(2)-Zn(1)-O(1)#1   | 89.00(5) | N(1)-Zn(1)-O(1)#1 | 151.44(5) |
| O(2)#1-Zn(1)-O(1)#1 | 59.99(5) | O(5)-Zn(1)-O(1)#1 | 104.41(5) |
| O(6)-Zn(1)-O(1)#1   | 93.88(5) |                   |           |

---

Symmetry transformations used to generate equivalent atoms: #1 -x+1,y+1/2,-z+1/2.

**Table S2.** Selected bond distances (Å) and angles (°) for **2**.

---

|                     |            |                   |            |
|---------------------|------------|-------------------|------------|
| Ni(1)-N(3)          | 2.011(4)   | Ni(1)-N(1)        | 2.060(5)   |
| Ni(1)-O(5)#1        | 2.083(3)   | Ni(1)-O(1)        | 2.125(4)   |
| Ni(1)-O(2)          | 2.134(4)   | Ni(1)-O(6)#1      | 2.148(3)   |
| N(3)-Ni(1)-N(1)     | 96.72(18)  | N(3)-Ni(1)-O(5)#1 | 96.60(16)  |
| N(1)-Ni(1)-O(5)#1   | 94.20(17)  | N(3)-Ni(1)-O(1)   | 99.11(19)  |
| N(1)-Ni(1)-O(1)     | 99.96(18)  | O(5)#1-Ni(1)-O(1) | 157.40(15) |
| N(3)-Ni(1)-O(2)     | 92.04(17)  | N(1)-Ni(1)-O(2)   | 160.93(16) |
| O(5)#1-Ni(1)-O(2)   | 101.61(15) | O(1)-Ni(1)-O(2)   | 61.80(15)  |
| N(3)-Ni(1)-O(6)#1   | 158.45(15) | N(1)-Ni(1)-O(6)#1 | 88.32(16)  |
| O(5)#1-Ni(1)-O(6)#1 | 62.05(13)  | O(1)-Ni(1)-O(6)#1 | 100.63(16) |
| O(2)-Ni(1)-O(6)#1   | 89.71(15)  |                   |            |

---

Symmetry transformations used to generate equivalent atoms: #1 x+1/2,y+1/2,z

**Table S3.** Selected bond distances (Å) and angles (°) for **3**.

---

|                   |            |                   |            |
|-------------------|------------|-------------------|------------|
| Ni(1)-N(1)        | 2.062(3)   | Ni(1)-N(2)        | 2.069(4)   |
| Ni(1)-O(5)#1      | 2.083(3)   | Ni(1)-O(2)        | 2.097(3)   |
| Ni(1)-O(1)        | 2.100(3)   | Ni(1)-O(6)#1      | 2.144(3)   |
| N(1)-Ni(1)-N(2)   | 94.42(13)  | N(1)-Ni(1)-O(5)#1 | 94.03(13)  |
| N(2)-Ni(1)-O(5)#1 | 101.70(13) | N(1)-Ni(1)-O(2)   | 107.20(14) |
| N(2)-Ni(1)-O(2)   | 92.78(13)  | O(5)#1-Ni(1)-O(2) | 153.31(12) |
| N(1)-Ni(1)-O(1)   | 169.70(14) | N(2)-Ni(1)-O(1)   | 89.57(14)  |

|                     |           |                   |            |
|---------------------|-----------|-------------------|------------|
| O(5)#1-Ni(1)-O(1)   | 94.45(11) | O(2)-Ni(1)-O(1)   | 63.06(12)  |
| N(1)-Ni(1)-O(6)#1   | 89.07(13) | N(2)-Ni(1)-O(6)#1 | 164.14(13) |
| O(5)#1-Ni(1)-O(6)#1 | 62.58(11) | O(2)-Ni(1)-O(6)#1 | 100.96(12) |
| O(1)-Ni(1)-O(6)#1   | 89.66(12) |                   |            |

---

Symmetry transformations used to generate equivalent atoms: #1 x,y,z-1

**Table S4.** Selected bond distances (Å) and angles (°) for **4**.

---

|                       |            |                       |            |
|-----------------------|------------|-----------------------|------------|
| Cd(1)-N(4)            | 2.266(5)   | Cd(1)-O(2)            | 2.518(5)   |
| Cd(1)-O(1W)           | 2.295(4)   | Cd(1)-O(1)            | 2.340(5)   |
| Cd(1)-O(5)            | 2.353(5)   | Cd(1)-O(5)#3          | 2.387(4)   |
| Cd(1)-O(6)#3          | 2.502(5)   | Cd(2)-N(1)            | 2.257(5)   |
| Cd(2)-O(12)#2         | 2.516(5)   | Cd(2)-O(2W)           | 2.292(4)   |
| Cd(2)-O(11)           | 2.330(5)   | Cd(2)-O(10)#1         | 2.357(5)   |
| Cd(2)-O(11)#2         | 2.407(4)   | Cd(2)-O(9)#1          | 2.506(5)   |
| N(1)-Cd(2)-O(2W)      | 174.87(17) | N(1)-Cd(2)-O(11)      | 100.63(19) |
| O(2W)-Cd(2)-O(11)     | 83.46(16)  | N(1)-Cd(2)-O(10)#1    | 89.76(19)  |
| O(2W)-Cd(2)-O(10)#1   | 86.68(17)  | O(11)-Cd(2)-O(10)#1   | 96.46(17)  |
| N(1)-Cd(2)-O(11)#2    | 86.94(18)  | O(2W)-Cd(2)-O(11)#2   | 97.35(16)  |
| O(11)-Cd(2)-O(11)#2   | 71.61(18)  | O(10)#1-Cd(2)-O(11)#2 | 166.76(19) |
| N(1)-Cd(2)-O(9)#1     | 88.26(18)  | O(2W)-Cd(2)-O(9)#1    | 86.65(15)  |
| O(11)-Cd(2)-O(9)#1    | 149.07(15) | O(10)#1-Cd(2)-O(9)#1  | 53.66(18)  |
| O(11)#2-Cd(2)-O(9)#1  | 138.92(17) | N(1)-Cd(2)-O(12)#2    | 94.81(19)  |
| O(2W)-Cd(2)-O(12)#2   | 85.60(17)  | O(11)-Cd(2)-O(12)#2   | 121.29(15) |
| O(10)#1-Cd(2)-O(12)#2 | 140.17(18) | O(11)#2-Cd(2)-O(12)#2 | 52.99(15)  |
| O(9)#1-Cd(2)-O(12)#2  | 86.89(16)  | N(4)-Cd(1)-O(1W)      | 175.14(18) |
| N(4)-Cd(1)-O(1)       | 91.49(19)  | O(1W)-Cd(1)-O(1)      | 85.51(17)  |
| N(4)-Cd(1)-O(5)       | 101.0(2)   | O(1W)-Cd(1)-O(5)      | 83.09(17)  |
| O(1)-Cd(1)-O(5)       | 96.14(18)  | N(4)-Cd(1)-O(5)#3     | 85.36(18)  |

|                    |            |                     |            |
|--------------------|------------|---------------------|------------|
| O(1W)-Cd(1)-O(5)#3 | 98.44(17)  | O(1)-Cd(1)-O(5)#3   | 166.40(19) |
| O(5)-Cd(1)-O(5)#3  | 71.58(19)  | N(4)-Cd(1)-O(6)#3   | 94.3(2)    |
| O(1W)-Cd(1)-O(6)#3 | 85.70(16)  | O(1)-Cd(1)-O(6)#3   | 140.90(17) |
| O(5)-Cd(1)-O(6)#3  | 120.43(15) | O(5)#3-Cd(1)-O(6)#3 | 52.66(15)  |
| N(4)-Cd(1)-O(2)    | 88.84(18)  | O(1W)-Cd(1)-O(2)    | 86.30(16)  |
| O(1)-Cd(1)-O(2)    | 54.18(18)  | O(5)-Cd(1)-O(2)     | 149.25(16) |
| O(5)#3-Cd(1)-O(2)  | 138.76(17) | O(6)#3-Cd(1)-O(2)   | 87.27(15)  |

---

Symmetry transformations used to generate equivalent atoms: #1  $x-1, y-1, z+1$ ; #2  $-x+1, -y+1, -z$ ; #3  $-x+3, -y+2, -z$

**Table S5.** Selected bond distances (Å) and angles (°) for **5**.

---

|                     |            |                     |            |
|---------------------|------------|---------------------|------------|
| Mn(1)-N(1)          | 2.296(2)   | Mn(1)-N(2)          | 2.2566(19) |
| Mn(1)-O(8)          | 2.1623(16) | Mn(1)-O(12)         | 2.0863(17) |
| Mn(1)-O(13)         | 2.4416(18) | Mn(1)-O(14)         | 2.2260(16) |
| Mn(2)-O(7)          | 2.2591(16) | Mn(2)-O(11)         | 2.1131(16) |
| Mn(2)-O(13)         | 2.1305(15) | Mn(3)-N(3)          | 2.253(2)   |
| Mn(3)-N(4)          | 2.319(2)   | Mn(3)-O(1)          | 2.2486(18) |
| Mn(3)-O(2)          | 2.418(2)   | Mn(3)-O(6)          | 2.1225(17) |
| Mn(3)-O(18)         | 2.1067(17) | Mn(4)-O(1)          | 2.2028(16) |
| Mn(4)-O(5)          | 2.1436(17) | Mn(4)-O(17)         | 2.1305(17) |
| O(12)-Mn(1)-O(8)    | 145.72(7)  | O(12)-Mn(1)-O(14)   | 102.53(7)  |
| O(8)-Mn(1)-O(14)    | 95.50(6)   | O(12)-Mn(1)-N(2)    | 97.44(7)   |
| O(8)-Mn(1)-N(2)     | 113.34(7)  | O(14)-Mn(1)-N(2)    | 84.19(6)   |
| O(12)-Mn(1)-N(1)    | 87.06(7)   | O(8)-Mn(1)-N(1)     | 87.77(7)   |
| O(14)-Mn(1)-N(1)    | 156.47(7)  | N(2)-Mn(1)-N(1)     | 73.19(7)   |
| O(12)-Mn(1)-O(13)   | 83.46(6)   | O(8)-Mn(1)-O(13)    | 83.13(6)   |
| O(14)-Mn(1)-O(13)   | 55.54(6)   | N(2)-Mn(1)-O(13)    | 138.47(6)  |
| N(1)-Mn(1)-O(13)    | 147.85(6)  | O(11)#3-Mn(2)-O(11) | 180.00(7)  |
| O(11)#3-Mn(2)-O(13) | 90.77(7)   | O(11)-Mn(2)-O(13)   | 89.23(7)   |



|                       |            |                      |            |
|-----------------------|------------|----------------------|------------|
| O(11)#3-Mn(2)-O(13)#3 | 89.23(7)   | O(11)-Mn(2)-O(13)#3  | 90.77(7)   |
| O(13)-Mn(2)-O(13)#3   | 180.00(7)  | O(11)#3-Mn(2)-O(7)#3 | 91.95(7)   |
| O(11)-Mn(2)-O(7)#3    | 88.05(7)   | O(13)-Mn(2)-O(7)#3   | 90.16(6)   |
| O(13)#3-Mn(2)-O(7)#3  | 89.84(6)   | O(11)#3-Mn(2)-O(7)   | 88.05(7)   |
| O(11)-Mn(2)-O(7)      | 91.95(7)   | O(13)-Mn(2)-O(7)     | 89.84(6)   |
| O(13)#3-Mn(2)-O(7)    | 90.16(6)   | O(7)#3-Mn(2)-O(7)    | 180.0      |
| O(18)-Mn(3)-O(6)      | 93.75(7)   | O(18)-Mn(3)-O(1)     | 112.58(7)  |
| O(6)-Mn(3)-O(1)       | 101.78(7)  | O(18)-Mn(3)-N(3)     | 89.45(7)   |
| O(6)-Mn(3)-N(3)       | 111.56(7)  | O(1)-Mn(3)-N(3)      | 138.66(7)  |
| O(18)-Mn(3)-N(4)      | 161.77(8)  | O(6)-Mn(3)-N(4)      | 90.96(7)   |
| O(1)-Mn(3)-N(4)       | 83.55(7)   | N(3)-Mn(3)-N(4)      | 72.46(8)   |
| O(18)-Mn(3)-O(2)      | 99.80(7)   | O(6)-Mn(3)-O(2)      | 157.14(7)  |
| O(1)-Mn(3)-O(2)       | 55.98(6)   | N(3)-Mn(3)-O(2)      | 87.05(7)   |
| N(4)-Mn(3)-O(2)       | 81.89(7)   | O(17)#4-Mn(4)-O(17)  | 180.000(1) |
| O(17)#4-Mn(4)-O(5)    | 91.65(7)   | O(17)-Mn(4)-O(5)     | 88.35(8)   |
| O(17)#4-Mn(4)-O(5)#4  | 88.35(8)   | O(17)-Mn(4)-O(5)#4   | 91.65(7)   |
| O(5)-Mn(4)-O(5)#4     | 180.000(1) | O(17)#4-Mn(4)-O(1)   | 92.17(7)   |
| O(17)-Mn(4)-O(1)      | 87.83(7)   | O(5)-Mn(4)-O(1)      | 90.26(7)   |
| O(5)#4-Mn(4)-O(1)     | 89.74(7)   | O(17)#4-Mn(4)-O(1)#4 | 87.83(7)   |
| O(17)-Mn(4)-O(1)#4    | 92.17(7)   | O(5)-Mn(4)-O(1)#4    | 89.74(7)   |
| O(5)#4-Mn(4)-O(1)#4   | 90.26(7)   | O(1)-Mn(4)-O(1)#4    | 180.0      |

---

Symmetry transformations used to generate equivalent atoms: #1 -x+2,-y-1,-z+2; #2 -x-1,-y+1,-z+1; #3 -x,-y+1,-z+1; #4 -x+2,-y,-z+2
